# 1 Have coral snake mimics diversified more than non-mimics?

2

3 **Running title:** Evolution of coral snake color patterns

4

5 **Figures in main text:** Figures 1 to 4

6 **Figures in Supporting information:** Figures S1 to S3

7

8 **Data archival location:**

9 BEAST XML file and BiSSE MCMC results: <http://dx.doi.org/10.6084/m9.figshare.831493>

10 R code for analyses and simulations: [https://github.com/Caetanods/Dipsadidae\\_color\\_evolution](https://github.com/Caetanods/Dipsadidae_color_evolution)

11

12 **Authors:**

13 **Daniel S. Caetano<sup>1†</sup>, Laura R.V. Alencar<sup>2</sup>, Paulo Passos<sup>3</sup>, Felipe G. Grazziotin<sup>4</sup>, Hussam Zaher<sup>4</sup>,**

14 **Marcio Martins<sup>2</sup>**

15

16 <sup>1</sup> *Department of Bioinformatics and Computational Biology, University of Idaho, Life Sciences South*  
17 *252, Moscow, ID, 83843, USA. E-mail: caetanods1@gmail.com*

18 <sup>2</sup> *Departamento de Ecologia, Universidade de São Paulo, São Paulo, SP, 05508-900, Brazil*

19 <sup>3</sup> *Departamento de Vertebrados, Museu Nacional, Universidade Federal do Rio de Janeiro, Rio de*  
20 *Janeiro, RJ, 20940-040, Brazil*

21 <sup>4</sup> *Museu de Zoologia, Universidade de São Paulo, São Paulo, SP, 04263-000, Brazil*

22 <sup>†</sup> *Corresponding author.*

23

24

25

## 26 Abstract

27

28 Dipsadidae is the most diversified family of snakes, composed of species showing an impressive  
 29 variety of color patterns. Some species are cryptic whereas others have contrasting patterns comprised  
 30 by bright colors alternated with darker shades, including particular combinations of vivid colors  
 31 characteristic of coral snakes (Elapidae). Species with such patterns are thought to be mimics of coral  
 32 snakes based on their color pattern similarity, predator avoidance of such patterns in field experiments,  
 33 and the geographical concordance between models and mimics. Here we test whether color patterns  
 34 associated with coral snake mimicry and contrasting color patterns in general influenced the  
 35 diversification dynamics of the group. We compile the largest database of color patterns among reptiles  
 36 to date, with color descriptions for the majority (594 species) of dipsadids. We used trait-dependent  
 37 diversification models along with extensive simulations to deal with the recently described statistical  
 38 bias associated with such methods. Despite the apparent survival advantage associated with coral snake  
 39 mimicry, we show that there is no detectable influence of color types in the dynamics of diversification  
 40 in Dipsadidae. We discuss insights into the function of color patterns and argue that non-mimic  
 41 contrasting patterns might serve as pre-adaptations to mimicry of coral snakes.

42

43 **Key words:** mimicry, coloration, database, diversification rates, crypsis.

Colors play an important role in avoiding predation. Patterns similar to the background

environment make prey difficult for the predators to detect and recognize (Merilaita and Lind 2005,

Stevens and Merilaita 2009). On the other hand, bright and contrasting colors displayed by unpalatable,

toxic or venomous animals (i. e., aposematic patterns) serve as warning signals that are often avoided

by visually oriented predators (Wallace 1867, Mappes et al. 2005, Speed and Ruxton 2005). However,

such conspicuous colors can also be displayed by mimics, which gain protection by deceiving predators

that avoid their false warning signals. Strong evidence from field experiments shows that mimicry of

warning signals decreases predation pressure when compared to cryptic color patterns (Jeffords et al.

1979, Brodie 1993, Brodie and Janzen 1995, Pfennig et al. 2001, Pinheiro 2011, Pfennig et al. 2015).

Such reduction in predation pressure may also have positive impacts on habitat use by aposematic

lineages and their mimics. Cryptic animals are to some degree restricted to backgrounds which their

color patterns match and may only be active at certain times because movement is often antithetic to

good crypsis (Speed et al. 2010, Stevens and Ruxton 2012). In contrast, such restrictions may be

weaker in aposematic or mimic lineages, which could promote more opportunities to exploit habitat

resources (Speed et al. 2010).

In contrast with aposematism, the survival advantage of Batesian mimicry is dependent on the

relationship between the model and the mimetic organism because predators need to associate the

unpalatability or hazard of the model with the warning signals of the deceiver. Once this association is

broken, a mimicry breakdown occurs and the mimic phenotype might become maladaptive since

warning signals can make individuals more conspicuous to predators (Mallet and Joron 1999, Pfennig

et al. 2001, Pfennig et al. 2015). Mimicry breakdown can be caused by allopatry between mimic and

model populations as a result of population expansion of the mimic or local extinction of the model

(Pfennig and Mullen, 2010). Allopatric mimics are conspicuous to naïve predators that might not avoid

their deceptive warning signals and this may result in higher predation rates and eventual extinction of

the mimic population (Pfennig et al. 2015). On the other hand, population expansion or migration of mimics can create opportunities for local adaptation to novel aposematic models. This process could result in selection against intermediate hybrids followed by decreased gene flow among populations and eventually promote reproductive isolation (Mallet and Joron 1999, Pfennig et al. 2015). Over longer time scales such processes might have a positive effect on rates of diversification of mimetic lineages. Previous studies show that aposematic lineages are more species-rich than cryptic ones (Santos et al. 2003, Przeczek et al. 2008), suggesting that the evolution of the aposematic condition may even represent a key innovation (Speed et al., 2010). This key innovation hypothesis could be extended to mimicry; however, the potential effects of mimicry evolution on lineage diversification have yet to be investigated.

Among snakes, groups of relatively harmless or mildly venomous species showing color patterns similar to those of venomous coral snakes (Elapidae) have instigated a long debate on whether such patterns are mimetic (see a comprehensive review in Pough 1988). Savage and Slowinski (1992) compiled a remarkable list of coloration descriptions and designed a system of categories to facilitate recognition of coral snake mimics and association with their supposed models. Early reports also relied primarily on the similarity of color patterns between mimics and models to argue in favor of mimicry relationships (Dunn 1954, Hecht and Marien 1956, also see Greene and McDiarmid 1981). Additional evidence came from parallel geographic variation of coral snakes and their putative mimics (e. g., Hecht and Marien 1956, Zweifel 1960, Greene and McDiarmid 1981, Marques and Puerto 1991) and from field studies using replicas of coral snakes and other similar color patterns (Smith 1975, Brodie 1993, Brodie and Janzen 1995, Hinman et al. 1997, Pfennig et al. 2001, Buasso et al. 2006).

Some authors pointed to the possibility that contrasting colors, including the stereotypical banded pattern observed in almost all coral snakes, could serve a disruptive function (Gadow 1908, Thayer 1918, Dunn 1954, and Brattstrom 1955). Those reports suggested that the alternate pattern of bands could blend to the background environment and break the outline of the snake body, making

93 recognition by visually oriented predators difficult. Recently, Titcomb and colleagues (2014) showed  
 94 that the contrasting ringed pattern of coral snake mimics can create an illusory effect when the  
 95 individuals are moving fast. The effect, called flicker-fusion, can give advantage to snakes against  
 96 avian predators independent of mimicry. Despite its protective effect, the plausible disruptive function  
 97 of the contrasting bands do not invalidate the existence of a mimicry complex between elapids and  
 98 snakes from other families, since the same color pattern can perform both functions (Titcomb et al.,  
 99 2014).

100         The family Dipsadidae (Zaher et al. 2009, sensu Grazziotin et al. 2012) is the most diverse  
 101 among snakes, with ca. 700 species occurring from Central to South America (Grazziotin et al. 2012,  
 102 Uetz and Hosek 2014), and is characterized by an impressive variety of color patterns (see Martins and  
 103 Oliveira 1998 for some examples). Some dipsadids have color patterns similar to those of coral snakes,  
 104 and have long been suggested as cases of mimicry of New World coral snakes of the genus *Micrurus*  
 105 and *Leptomicrurus* (family Elapidae; Wallace 1867, Greene and McDiarmid 1981, Sazima and Abe  
 106 1991, Savage and Slowinski 1992, Martins and Oliveira 1993, Pough 1988, Almeida et al. 2014). The  
 107 contrasting coloration found in dipsadid snakes always includes bright colors but is not restricted to  
 108 ringed patterns. In general, species can vary from the coral snake pattern of black, red and yellow rings  
 109 or bands to a less colorful homogeneous red body with a single black or cream band on the neck  
 110 (nuchal collar). Besides contrasting color patterns, the family also shows a diverse array of cryptic  
 111 color patterns, characterized by blotches and shades of brown, gray, or green. Included in the latter are  
 112 species whose dorsum is cryptic and whose venter has a plain bright color and even a coral snake  
 113 pattern. Mimetic and cryptic patterns can be found both within and among genera and make dipsadid  
 114 snakes an ideal study system to investigate the possible effects of such distinct color types on  
 115 macroevolutionary patterns.

116         Herein we test whether distinct color patterns have an influence on the diversification of the  
 117 family Dipsadidae. We investigate whether color patterns similar to coral snakes (and contrasting color

patterns in general) show diverging macroevolutionary patterns when compared to non-mimic and cryptic lineages, respectively. We compile and make available a database with color pattern descriptions for the vast majority of species in the group. We show that there is no detectable influence of supposedly mimic or contrasting color patterns in the dynamics of diversification and argue that non-mimic contrasting color patterns may be pre-adaptations to mimicry of coral snakes.

## Methods

### *Phylogenetic reconstruction*

We used sequence data for Dipsadidae and outgroup species available in GenBank (Benson et al. 2014) and previously analyzed by Grazziotin and colleagues (2012, see accession numbers in their Appendix S1). We aligned sequences using MAFFT (Katoh et al. 2005) under the G-INS-i strategy and selected models of molecular evolution for each of the eight gene sequences using a decision theory framework in DT-ModSel (Minin et al. 2003). We concatenated the alignments and set four partitions; one partition for each nuclear gene (*bdnf*, *c-mos*, and *rag2*) and a single partition with the mitochondrial genes (12S, 16S, *cytb*, *nd2*, and *nd4*). We used phyutility (Smith and Dunn 2008) to trim down all sites with 75% or more missing data and inferred a Maximum Likelihood (ML) tree using GARLI 2.0 (Zwickl 2011). We used the resulting ML phylogeny as the starting tree for three independent searches in BEAST 1.8 (Drummond et al. 2012) for 270 million generations with a thinning interval of 1500 generations each. Since there are sequences available for only few species of each genera we set an incomplete sampling birth-death tree prior (Stadler 2009) and an uncorrelated relaxed clock model to estimate relative branching times. We checked each run for convergence using Tracer 1.6 (Drummond et al. 2012) and excluded 50% of the posterior chain as burnin. We then combined the posterior set of trees from the three BEAST searches and randomly sampled 100 trees to account for phylogenetic uncertainty in all subsequent analyses. The 100 sampled trees and the BEAST xml file comprising the data matrix, selected models of molecular evolution, starting tree and prior

parameters is available in FigShare (<http://dx.doi.org/10.6084/m9.figshare.831493>). We also deposited the configuration and log files for GARLI 2.0. Figure S1 shows the resulting maximum clade credibility (MCC) tree and respective posterior probability support values.

146

### 147 *Color patterns*

148 To understand the evolution of colors and its effect on diversification we compiled the most complete database of coloration patterns for dipsadid snakes. We searched several information sources 149 such as comprehensive taxonomic reviews (e.g., Downs 1967), published articles and books containing 150 photographs of identified individuals (e.g., Savage 2002), trusted on-line photo repositories (e.g., 151 CalPhotos - <http://calphotos.berkeley.edu/> and Reptile Database – <http://www.reptile-database.org/>), 152 photographs of live specimens, and examination of individuals preserved in scientific collections (e.g., 153 type specimens). We excluded invalid taxa or names presenting nomenclatural problems that are still 154 appearing in the literature or online databases. We avoided subspecific ranks for coding the currently 155 recognized taxa (with the exception of four subspecies of *Alsophis antillensis*) because terminals in 156 available phylogenies correspond to species only and less than 10% of the members of the family 157 Dipsadidae present valid subspecies to date.

159 While color diversity makes the family Dipsadidae interesting for studies focusing on the 160 evolution of color patterns such as ours, this is also the most challenging characteristic of the system. 161 Since it is not possible to consider all diversity of color patterns for comparative analyses, we used 162 broad categories that are directly related to the hypotheses tested. In a first test, we used the categories 163 *coral-mimic* and *non-mimic* (see Figure 1 and database available in 164 <http://dx.doi.org/10.6084/m9.figshare.831493>). We call *coral-mimics* species that resemble the pattern 165 of any New World coral snake species (see Roze 1996, Campbell and Lamar 2004). Species included in 166 this category can show the coral-mimic pattern throughout the dorsum (e.g., *Simophis rhinostoma*) or 167 restricted to the anterior portion of the body (e.g., *Pseudoboa coronata*). It is impossible to elect

168 species-specific mimicry hypotheses for all 121 species included in the coral-mimic category given our  
 169 current knowledge of the ecology and geographical distribution of the group. Therefore, we assigned  
 170 species based on their color pattern similarity with putative models. On the other hand, all species not  
 171 defined as potential mimics of coral snakes, independent of whether their color pattern was better  
 172 described as contrasting or cryptic, were included in the category of *non-mimics*. As a result, the *non-*  
 173 *mimic* category comprise species with cryptic color patterns and others with bright coloration but not  
 174 resembling any known lineage of New World coral snake.

175 Our definition of *non-mimic* species includes both species that show cryptic color patterns  
 176 such as hues and blotches of brown or green and bright colored patterns, which are likely to be more  
 177 conspicuous to a visually oriented predator. One might argue that such definition is too inclusive, and  
 178 the same category comprises different defensive strategies. In this light, we performed separate  
 179 analyses using species that show brightly colored patterns in general, independent of whether the color  
 180 pattern was similar to those of coral snakes. We defined such lineages as *contrasting*. Given our  
 181 definitions, the category *coral-mimic* is a subset of the *contrasting* category; every *coral-mimic* lineage  
 182 is among the species defined as *contrasting*, but the reverse is not true. We included species not  
 183 classified as *contrasting* into a single category comprising *cryptic* patterns. Cryptic coloration has been  
 184 defined as any pattern resembling a random sample of the habitat background (Endler 1986). However,  
 185 since we do not have accurate habitat descriptions for most of species, we defined as *cryptic* all color  
 186 patterns lacking contrasting colors (with exception of arboreal snakes, see below). Examples of such  
 187 patterns are blotches with hues of brown, reddish brown, gray, and other combinations of dark colors.  
 188 We also considered as *cryptic* species whose dorsum is homogeneously green, since individuals of  
 189 those species are usually found among leaves of trees and bushes (e.g., *Uromacer*). Some Pseudoboini  
 190 snakes (sensu Zaher et al. 2009) show ontogenetic changes in color pattern in which juveniles are  
 191 brightly colored but become cryptic when adults (Martins and Oliveira 1998). We included those  
 192 species into the *contrasting* category since juveniles correspond to the life stage most threatened by



193 predation (Bonnet et al. 1999) and thus their defensive tactics are fundamental for individuals to reach  
194 sexual maturity. Some species show cryptic color patterns in the dorsum but have contrasting patterns  
195 restricted to the venter. The distinct patterns in the dorsum and venter are usually associated with a  
196 threatening display in which individuals twist the body and expose the bright colors when disturbed  
197 (Martins and Oliveira 1993, Sawaya et al. 2008, Tozetti et al. 2009). Hence, we classified those cases  
198 into the *contrasting* category instead of following their dorsal coloration. We performed additional  
199 analyses in which those species were classified as cryptic, but found no appreciable difference in  
200 results.

201         Some species are known to show color polymorphism. In such cases populations may show  
202 cryptic patterns occasionally associated to thermoregulation (Tanaka 2005, but see Lorient et al. 2008).  
203 Alternatively, contrasting colors in polymorphic populations can be due to increasing sexual  
204 dichromatism in the course of the reproductive season (Forsman 1995, Lindell and Forsman 1996),  
205 related to non-selective processes, such as migration and dispersal (King and Lawson, 1995) or genetic  
206 drift in local (Brakefield, 1990) or island populations (Bittner and King, 2003). Independent of the  
207 potential sources of the polymorphic color patterns we assigned species to the *cryptic* category every  
208 time a cryptic morph was described among the color types.

209

## 210 *Comparative analyses*

211         We sampled 100 trees from the posterior distribution of the BEAST analysis, rescaled all trees  
212 to a total depth of 1, and retained only one randomly selected species of each genus while pruning the  
213 rest. When the original tree had paraphyletic genera we selected the most inclusive monophyletic clade  
214 representing each group and kept a single species to represent each of those genera. We used the  
215 terminally unresolved trees (FitzJohn et al. 2009), the number of species of each genus and their color  
216 patterns to test hypotheses of trait-dependent diversification using the Binary State Speciation and  
217 Extinction model (BiSSE - Maddison et al. 2007, FitzJohn et al. 2009, FitzJohn 2012). We repeated all

218 BiSSE analyses based on the two color categorizations: *coral-mimic* versus *non-mimic* and *contrasting*  
 219 versus *cryptic*. We used Markov chain Monte Carlo (MCMC) to estimate the posterior distribution of  
 220 the parameters for the unconstrained BiSSE model (six free parameters), in which speciation ( $\lambda$ ) and  
 221 extinction ( $\mu$ ) are estimated dependent on the color pattern of the lineages, and the constrained model,  
 222 in which  $\lambda$  and  $\mu$  are not related to color types (four free parameters). We used an exponential prior  
 223 distribution with rate parameter equal to 0.3 for all BiSSE parameters and a starting point equal to the  
 224 maximum likelihood estimate (MLE). We ran 10,000 generations of MCMC (chain length was based  
 225 on preliminary analyses), discarded 50% of generations as burnin and checked convergence using the  
 226 'coda' package (Plummer et al. 2006). To test whether the full model explained the data better than the  
 227 trait-independent model we performed model selection using the Bayesian Deviance Information  
 228 Criteria (DIC – Gelman et al. 2014). We performed all analyses with both the *coral-mimic* versus *non-*  
 229 *mimic* and the *contrasting* versus *cryptic* categories.

230 In addition to the BiSSE model, which estimates homogeneous diversification rates across the  
 231 tree, we used Medusa (Alfaro et al. 2009) to test whether rates of diversification change independent of  
 232 color types. This model estimates rates of diversification and jump locations in a given phylogeny  
 233 using a stepwise AIC approach to sequentially fit models of diversification with increased number of  
 234 jumps in rates of speciation and extinction. In order to incorporate the effect of uncertainty in topology  
 235 and branch lengths we applied Medusa across all 100 sampled trees. However, there is no simple  
 236 solution to summarize those results, since distinct tree topologies have unique sets of nodes. Thus, we  
 237 chose to focus only in the rate estimates for the external branches (i.e., the genera). This approach  
 238 allows us to compare groups of genera showing consistently higher or lower rates of diversification  
 239 with respect to the background rate, ignoring information about the specific position of each jump.

240 Recently, Rabosky and Goldberg (2015) showed that the BiSSE model is likely to produce  
 241 significant results even when there is no true relationship between traits and shifts in diversification  
 242 rates. We performed simulations to correct our results for this deviation. Since the BiSSE model

influences the dynamics of diversification and makes it difficult to simulate trait data under a fixed tree, each simulation generated both trait data and phylogeny. First, we did posterior predictive checks for model adequacy to test whether data simulated under the trait-dependent and trait-independent BiSSE models are similar to the observed data. For each model, we simulated traits using the 'tree.bisse' function in the package 'diversitree' (FitzJohn 2012) with parameters drawn from the joint posterior distribution resulting from the BiSSE analysis and constraining simulations to have a tree depth equal to 1 (identical to the empirical trees). Finally, we compared the number of species and the relative frequencies of each trait generated by the simulations with the empirical dataset. If models are adequate, simulated phylogenies should produce both diversity and frequency of states similar to the observed data.

In order to check if the support for the chosen model is not a statistical artifact, we created 100 new datasets by drawing from a binomial distribution with probabilities equal to the frequency of each trait in the observed data. We sampled 10 trees from the posterior distribution that resulted from the BEAST analysis and performed an MLE of the BiSSE model (trait-independent and full model) using each of the simulated datasets. We computed the likelihood ratio test for each BiSSE estimate and produced a distribution of p values for each of the 10 sampled trees. This distribution represents the expected p values for the likelihood ratio test when traits have no effect in diversification. Following, we tested whether p values obtained in the model test using the observed data and the same trees are significantly smaller than the distribution under the null model (i.e., data generated from a binomial distribution).

To perform ancestral state estimates, we calculated the grand mean of the posterior distribution of transition rates ( $q_{01}$  and  $q_{10}$ ) across all 100 sampled trees under the accepted model after performing the BiSSE simulations. Then we used those values to infer the MLE of the marginal ancestral states reconstruction on the maximum clade credibility (MCC) tree. We performed all

comparative analyses in R (R Core Team 2015). Scripts to replicate analyses, simulations, and figures are available in [https://github.com/Caetanods/Dipsadidae\\_color\\_evolution](https://github.com/Caetanods/Dipsadidae_color_evolution).

269

## 270 Results

We compiled the largest report of coloration descriptions for reptiles comprising data for 594 species of dipsadid snakes and covering over 80% of the known diversity of the group. We were able to get detailed color descriptions for most species, but for some the information available was incomplete or limited (i.e., taxa known from a single specimen). Although those cases were not suitable for definition as *coral-mimic* or *non-mimic* lineages (i.e., state unknown or 'NA'), we managed to classify those as either *contrasting* or *cryptic* for all but a few exceptions. Among all data sources, museum specimens are the most difficult to categorize since colors fade after preservation and only light and dark hues remain. Bright colors such as yellow, orange, pink, and red (derived from carotenoid pigments) fade completely over time turning into cream on preservative fluid. In contrast, dark pigmentation is preserved and sometimes turns into shades of black or dark brown. As a result, we assigned museum specimens with alternate bright and dark bands (or with a distinct nuchal collar) as *contrasting* and homogeneous light or dark patterns as *cryptic*. We provide the species list and their color patterns under both categorization schemes in the online data repository ([https://github.com/Caetanods/Dipsadidae\\_color\\_evolution](https://github.com/Caetanods/Dipsadidae_color_evolution)).

We used the BiSSE model to investigate whether color patterns have an effect on the diversification rates of the snake family Dipsadidae. We made analyses based on two different categorizations of the same dataset: *coral-mimics* versus *non-mimics*, which tested for differences in macroevolutionary patterns between lineages with and without color patterns similar to New World coral snakes, and *contrasting* versus *cryptic* color patterns, which investigated changes in diversification associated with the presence or absence of bright coloration. When we compared *coral-mimic* to *non-mimic* patterns, the BiSSE analysis showed that *coral-mimic* lineages have net

292 diversification rates ( $\lambda_1 - \mu_1$ ) in average two times higher than *non-mimics* (Figure 2). When  
 293 diversification rates are constrained to be independent of color types we recovered intermediate net  
 294 diversification values relative to the trait-dependent model. These results are similar to the analyses  
 295 based on *contrasting* versus *cryptic* color patterns (Figure 2). Both the trait-independent and trait-  
 296 dependent diversification models estimated strongly asymmetrical transition rates with changes from  
 297 the *coral-mimic* to the *non-mimic* state ( $q_{10}$ ) in average two to three times more frequent than the  
 298 reverse ( $q_{01}$ ). Median transition rates are qualitatively comparable independent of color categorization  
 299 (Figure 3). On the other hand, the posterior distributions of transition rates for *coral-mimics* versus  
 300 *non-mimics* are wider than *contrasting* versus *cryptic*, showing more uncertainty in parameter  
 301 estimates. Results were consistent across all sampled trees and in all cases the state-dependent  
 302 diversification model was the one preferred by the DIC model selection criteria (Figure S2).

303 Results from the Medusa analyses, which estimate shifts in diversification rates independent  
 304 of color types, indicate that the preferred model across all 100 trees was the Yule diversification model  
 305 (Yule 1924), which has a single birth parameter in the absence of extinction. The estimated median rate  
 306 is comparable across almost all genera, but some clades have a tendency for higher rates of  
 307 diversification when compared to background rates (Figure S3). While most of the 100 sampled trees  
 308 were estimated to have homogeneous rates of diversification, a portion of these trees shows evidence  
 309 for higher rates that are consistently shared by a set of genera. Ten genera of the tribe Alsophiini, five  
 310 genera of Tachymenini, and a clade formed by *Pseudoeryx* and *Hydrops* show rate distributions with a  
 311 tendency for higher rates of diversification, although median values are not significantly distinct from  
 312 background rates (Figure S3).

313 We performed posterior predictive simulations and produced a null distribution of likelihood  
 314 ratio tests (LRTs) to evaluate whether the BiSSE trait-dependent diversification model is adequate to  
 315 explain the observed data and if preferring the more complex model is justifiable. Since there is no  
 316 appreciable difference in parameter estimates and DIC results across the categorizations of color types,

we performed simulations based only in the *contrasting* and *cryptic* categories. The posterior predictive simulations using both BiSSE models (trait-dependent and trait-independent) produced trees much smaller than the 594 species of the empirical tree (see left column of [Figure 4](#)). Since the stopping criteria for simulations were tree depth, the number of species in each simulated tree was free to vary. Trees simulated under the full model had on average 211 species and only 9% of those showed more species than the observed data. Similarly, trees simulated using the trait-independent model had on average 186 species, of which only 5% were larger than the observed data. With respect to trait frequency, both models simulated datasets biased towards higher frequencies of the *cryptic* color type. On average the full model had 67% and the trait-independent model 84% of the simulations showing frequencies of the *cryptic* color type higher than observed in the empirical data (see right column of [Figure 4](#)). Therefore, our results show that both models have similar biases and the characteristics of the data not satisfactorily explained by the BiSSE model are independent to whether rates of diversification are associated with color types.

Although parameter estimates under the BiSSE model are robust to our different categorization of color patterns, the ML ancestral state estimate is dependent on whether we consider the *coral-mimic* or *contrasting* color type categories. Ancestral estimates considering species as *coral-mimic* or *non-mimic* suggest the root node had a *non-mimic* color pattern and just two clades show high likelihood for *coral-mimic* ancestors ([Figure 1](#)). However, when species are categorized as *contrasting* or *cryptic*, the root node is reconstructed as most likely *contrasting* and several transitions to the *cryptic* form occurred throughout the tree with no evidence of reversals ([Figure 1](#)).

337

## 338 Discussion

339

### 340 *Model selection and (in)adequacy*

341 We fitted the trait-dependent and trait-independent BiSSE models to the data and performed  
 342 model selection using the Deviance Information Criteria (DIC). DIC showed strong support for the  
 343 trait-dependent model for both color pattern categorizations (*coral-mimic* versus *non-mimic* and  
 344 *contrasting* versus *cryptic*). However, our simulations showed that there is no evidence to choose the  
 345 trait-dependent model over the trait-independent model. Likelihood ratio tests on simulated data  
 346 consistently gave support to the trait-dependent diversification model (with threshold value of 0.05)  
 347 despite the fact that data were generated using draws from a binomial distribution, independent of the  
 348 phylogeny. The BiSSE method is likely to support the trait-dependent model even when there is no real  
 349 effect of traits on rates of diversification, supporting findings by Rabosky and Goldberg (2015). The  
 350 choice of the full model by the DIC approach was unjustifiable and might be a statistical artifact.  
 351 Hence, our preferred model is the trait-independent model in which color type has no influence on  
 352 diversification.

353 Posterior predictive simulations show that both the trait-independent and trait-dependent  
 354 BiSSE models share similar biases. Both BiSSE models are equally inadequate in explaining the  
 355 observed data whereas the LRT simulations provide evidence that the best model is the simpler model  
 356 rather than the model in which rates of diversification depend on color type. Results from the Medusa  
 357 analyses also corroborate this conclusion. There is no support for shifts in rates of diversification and  
 358 the majority of lineages showing a tendency for higher rates are comprised of cryptic species (Figure  
 359 S3). At the moment, unlike other models of trait evolution (Pennell et al. 2014), it is not clear which set  
 360 of summary statistics can be used to assess the adequacy of BiSSE models. More studies are needed to  
 361 better understand the scenarios under which this and other models of the xxSSE family are prone to  
 362 misbehave and elect a set of informative summary statistics for predictive posterior checks.



### 363 *Uncertainty in ancestral state estimates*

364       The observed variation in ancestral estimates (Figure 1) despite similar parameter estimates  
 365 for the BiSSE model under both color categorizations (Figures 2 and 3) is most likely an effect of the  
 366 proportion of states in each of the genera for each categorization. Given our color category definitions,  
 367 every *coral-mimic* was also included in the *contrasting* category, but the contrary is not true. The  
 368 proportion of *contrasting* species is higher than *coral-mimics* in several genera and may have increased  
 369 the likelihood of nodes estimated as *contrasting* when comparing to the same nodes under the *coral-*  
 370 *mimic* and *non-mimic* categorization. In both cases changes in color pattern are mostly concentrated  
 371 within genera, with exception of the tribes Alsophiini and Tachymenini, both comprising only *cryptic*  
 372 (*non-mimic*) species (marked respectively in green and red in Figure 1). In those tribes the transition  
 373 from *contrasting* to *cryptic* forms may have occurred at the base of the clades with reversals restricted  
 374 to the genus *Ialtris* (tribe Alsophiini). These results need to be interpreted with caution, since ancestral  
 375 estimates are often misleading and a fully resolved tree for the group might falsify our reconstructions  
 376 by showing reversals from *coral-mimic/contrasting* to *non-mimic/cryptic* color types present at the  
 377 genus level.

378

### 379 *Color patterns have no effect on the diversification of dipsadid snakes*

380       The function of coral-mimic and contrasting color patterns in snakes and other groups has  
 381 been intensely debated since the 50s (Dunn 1954, Hecht and Marien 1956). However, only a few  
 382 studies have investigated the evolution of snake color patterns using an explicit phylogenetic approach  
 383 (e.g., Pyron and Burbrink 2009) despite recent advances in comparative methods. Our results show no  
 384 appreciable effect of the color types in diversification rates despite the impressive diversity of color  
 385 patterns found in the group. Estimates of diversification rates independent of color types also give  
 386 support to the trait-independent model, since results do not suggest any concurrence of shifts in  
 387 diversification rates with the presence of coral-mimic or contrasting patterns. Overall, our results



388 suggest that the ecological functions of *coral-mimic* and *non-mimic* color types in dipsadid snakes have  
389 no distinguishable effect on the macroevolution of the group.

390 The hypotheses of mimicry based on color similarity between mimics and models have  
391 received strong support from field experiments and the survival advantage of mimicry is also often  
392 demonstrated (Smith 1975, Brodie 1993, Brodie and Janzen 1995, Hinman et al. 1997, Pfennig et al.  
393 2001, Buasso et al. 2006). If mimicry can explain the color types of dipsadid lineages that are similar to  
394 coral snakes, the protection attributed to the warning signal can have a positive effect on  
395 diversification, similar to the effect of aposematism (Mallet and Joron 1999, Przeczek et al. 2008).  
396 However, increased survival has no necessary link to the generation of new species and our results  
397 show that distinct color types are not associated with appreciable differences in macroevolutionary  
398 patterns in dipsadids, independent of their putative ecological function.

399

#### 400 *Contrasting patterns as potential pre-adaptation to coral snake mimicry*

401 Mimetic and contrasting patterns share bright colors that might be significantly more  
402 conspicuous to visually oriented predators than cryptic patterns. Field experiments using plasticine  
403 replicas provide evidence that the stereotyped alternating, bright colored bands (bearing shades of red,  
404 yellow, black and/or white) found among New World elapid species are avoided by predators (Brodie  
405 1993, Brodie and Janzen 1995, Hinman et al. 1997, Pfennig et al. 2001, Buasso et al. 2006), even when  
406 these patterns are simplified to an extent that only a single ring occurs on the neck or head and the  
407 remaining of the body is plain red (Brodie 1993; see also Hinman et al. 1997). However, contrasting  
408 patterns are not restricted to such alternating, bright colored bands. In the absence of mimicry, such  
409 patterns might serve as disruptive coloration and deceive predators by creating optical illusions or  
410 hindering prey recognition. Indeed, it is plausible that coral-like patterns might function both as  
411 mimetic and disruptive coloration (Dunn 1954, Titcomb et al. 2014). The disruptive function (or  
412 flicker-fusion effect) can prevent or mitigate maladaptation caused by allopatric distribution of mimics

413 and models, since it provides protection even in the presence of naïve predators. The double function of  
414 the contrasting pattern as mimetic and illusionary may help explain the impressive diversity of colors  
415 and patterns found among dipsadid snakes. One plausible explanation is that contrasting patterns may  
416 serve as pre-adaptations to the evolution of coral snake mimicry in certain lineages.

417         Ancestral node reconstructions of the *contrasting* pattern in dipsadids show that most genera  
418 are likely to have some form of *contrasting* colored ancestor (Figure 1). This pattern changes when  
419 considering only the subset of contrasting lineages with color patterns similar to coral snakes. In the  
420 latter case, reconstructions show that transitions most likely occurred exclusively within genera in 13  
421 out of 24 genera comprising *coral-mimic* lineages. Among the genera estimated to have *coral-mimic*  
422 ancestors 9 out of 11 belong to the Pseudoboini, characterized by a single transition to the *coral-mimic*  
423 type (Figure 1). Since *coral-mimics* are a subset of *contrasting* lineages and *contrasting* ancestors occur  
424 in nodes deeper in the tree than the *coral-mimics* ancestors, it is likely that *contrasting* patterns not  
425 resembling true coral snakes predate the supposed mimetic patterns. The disruptive effect of some  
426 contrasting patterns, especially those including light and dark bands, might confer protection against  
427 predation and can show rudimentary similarities to potential coral snake models. This scenario could  
428 lead to a mimicry relationship as predation pressure can produce a directional selective gradient pulling  
429 towards color patterns more similar to those of the model lineage. Although our results suggest this  
430 relationship, the current knowledge of the Dipsadidae phylogeny does not provide enough resolution to  
431 test this hypothesis, since changes from *contrasting* to *cryptic* patterns occurred almost exclusively  
432 within genera.

433

#### 434 *Ecological opportunity on the West Indies*

435         We estimated rates of diversification using a model that is agnostic to color types (Medusa)  
436 and two clades showed a tendency for elevated rates of diversification, the tribe Alsophiini and part of  
437 the tribe Tachymenini (Figure S3). Both tribes comprise cryptic species, with exception of the genus

438 *Ialtris*. The Alsophiini is an interesting case. It most likely dispersed from mainland South America  
 439 over the ocean to the West Indies, where it is endemic (Maglio 1970, Hedges et al. 2009). The West  
 440 Indies are known by the remarkable adaptive radiation of *Anolis* lizards (Losos and Ricklefs 2009) and  
 441 might also have provided ecological opportunities for the radiation of other squamate reptiles. For  
 442 instance, Burbrink and colleagues (2012) showed that the diversification of the Alsophiini in the West  
 443 Indies bears no signal of increased rates of diversification. In contrast, our results show a tendency for  
 444 increased rates of diversification associated with the same group. Absence of such signal in results by  
 445 Burbrink and colleagues (2012) may be a reflection of including only the Alsophiini in the analysis  
 446 whereas herein we used phylogenies including the whole family. The increased rate of diversification  
 447 of the Alsophiini may be, such as hypothesized by Burbrink et al. (2012), a function of the opportunity  
 448 for ecological diversification and not associated with the concurrent change from contrasting to cryptic  
 449 color patterns. It is important to note that the monophyly of the tribe has been contested by some  
 450 studies (Grazziotin et al. 2012, Pyron et al. 2013) and taxonomic rearrangements are likely to occur in  
 451 the future. It is possible that tests based on a revised taxonomy and a finer phylogenetic resolution may  
 452 show support for the hypothesis of ecological opportunity.

453

#### 454 **Concluding remarks**

455       Herein we compiled from primary sources and made available a database of color patterns for  
 456 594 species of dipsadid snakes, the largest compilation of color descriptions for reptiles to date. We  
 457 found that *coral-mimic* or *contrasting* patterns have no significant effect on rates of diversification  
 458 when compared to *non-mimic* or *cryptic* color types. This is an intriguing contrast with the fact that  
 459 aposematic clades are more species-rich than their cryptic sister groups (Przeczek et al. 2008).  
 460 Speciation or extinction of mimetic lineages are theoretically linked to the relationship with their  
 461 models. However, this dependence can be loosened if the mimetic trait is associated with a secondary  
 462 protective function. Both eventual extinction events caused by allopatry with models and speciation as

a result of local adaptation to novel models can be 'buffered' by the secondary function of the trait. The protection by illusion might be a precursor for both the remarkable convergence of snake lineages to coral-like forms and the maintenance of mimicry despite the supposed likelihood of mimicry breakdowns.

It is naïve to think that a unique set of traits, such as color patterns, can reflect all relevant factors that drive the dynamics of diversification of any group. A more detailed analysis of our questions could be accomplished by overlapping evolutionary patterns of the Dipsadidae with those of New World coral snakes, for example. However, both phylogenetic data and suitable comparative models are not yet available. Further appreciation of transitions between *contrasting* and *cryptic* color patterns within dipsadid genera can shed light on whether disruptive colors can serve as a pre-adaptation to mimicry and help insert new pieces into the coral snake mimicry puzzle. Understanding under which phylogenetic and ecological scenarios mimicry is likely to evolve is a key factor to explain the patterns of phenotypic convergence observed among distantly related lineages across the tree of life.

## Acknowledgments

We would like to thank Denim Jochimsen, Josef Uyeda, Matt Pennell, Rafael Maia, and Andrew Kraemer for extensive discussions about snakes and statistics. Special thanks to Luke Harmon, DSC advisor, for insightful comments on the work and manuscript. This project applied many ideas discussed at the Phylogenetics Reading Group (PuRGe) at the University of Idaho. DSC was supported by a fellowship from Coordenação de Aperfeiçoamento de Pessoal de Nível Superior (CAPES: 1093/12-6). LRVA was supported by Fundação de Amparo a Pesquisa do Estado de São Paulo (FAPESP, 2012/03038-2). Financial support to PP was provided by Conselho Nacional de Desenvolvimento Científico e Tecnológico (CNPq, 482086/2012-2 and 8256995713198058) and Fundação de Amparo a Pesquisa do Estado do Rio de Janeiro (E-26/110.434/2012 and E-

488 26/111.636/2012). FGG, HZ, and MM also thank FAPESP for a grant (2011/50206-9) and CNPq for  
489 fellowships.

490

## 491 **References**

- 492 Alfaro, M. E., F. Santini, C. Brock, H. Alamillo, A. Dornburg, D. L. Rabosky, G. Carnevale, and L. J.  
493 Harmon. 2009. Nine exceptional radiations plus high turnover explain species diversity in jawed  
494 vertebrates. *Proc Natl Acad Sci USA*. 106:13410-13414.
- 495 Almeida, P. C., D. T. Feitosa, P. Passos, and A. L. C. Prudente. 2014. Morphological variation and  
496 taxonomy of *Atractus latifrons* (Günther, 1868) (Serpentes: Dipsadidae). *Zootaxa*. 3860:64-80.
- 497 Benson, D. A., K. Clark, I. Karsch-Mizrachi, D. J. Lipman, J. Ostell, and E. W. Sayers. 2014. GenBank.  
498 *Nucleic Acids Res*. 42:D32-37.
- 499 Bittner, T. D., and R. B. King. 2003. Gene flow and melanism in garter snakes revisited: a comparison  
500 of molecular markers and island. vs. coalescent models. *Biol J Linn Soc*. 79:389-399.
- 501 Bonnet, X., G. Naulleau, and R. Shine. 1999. The dangers of leaving home: dispersal and mortality in  
502 snakes. *Biol Conserv*. 89:39-50.
- 503 Brakefield, P. M. 1990. Genetic drift and patterns of diversity among colour-polymorphic populations  
504 of the homopteran *Philaenus spumarius* in a island. archipelago. *Biol. J. Linn Soc*. 39:219-237.
- 505 Brattstrom, B. H. 1955. The coral snake “mimic” problem and protective coloration. *Evolution*. 9:217-  
506 219.
- 507 Brodie III, E. D. 1993. Differential avoidance of coral snake banded patterns by free-ranging avian  
508 predators in Costa Rica. *Evolution*. 47:227-235.
- 509 Brodie III, E. D., and F. J. Janzen. 1995. Experimental studies of coral snake mimicry: generalized  
510 avoidance of ringed snake patterns by free-ranging avian predators. *Funct Ecol*. 9(2):186-190.

511 Buasso, C. M., G. C. Leynaud, and F. B. Cruz. 2006. Predation on snakes of Argentina: Effects of  
512 coloration and ring pattern on coral and false coral snakes. *Stud Neotrop Fauna Environ.* 41:183-  
513 188.

514 Burbrink, F. T., S. Ruane, and R. A. Pyron. 2012. When are adaptive radiations replicated in areas?  
515 Ecological opportunity and unexceptional diversification in West Indian dipsadine snakes  
516 (Colubridae: Alsophiini). *J Biogeogr.* 39:465-475.

517 Campbell, J.A. and W.W. Lamar. 2004. *The Venomous Reptiles of the Western Hemisphere.* 2  
518 Volumes. Cornell University Press, Ithaca, NY.

519 Downs, F. L. 1967. Intrageneric relationships among colubrid snakes of the genus *Geophis* Wagler.  
520 *Misc Publ Mus Zool Univ Mich.* 131:1-188.

521 Drummond, A. J., M. A. Suchard, D. Xie, and A. Rambaut. 2012. Bayesian phylogenetics with BEAUti  
522 and the BEAST 1.7. *Mol Biol Evol.* 29(8):1969-1973.

523 Dunn, E. R. 1954. The coral snake “mimic” problem in Panama. *Evolution.* 8:97-102.

524 Endler, J. A. 1986. *Natural selection in the wild.* Princeton Univ. Press, Princeton, NJ.

525 FitzJohn, R. G. 2012. Diversitree: Comparative phylogenetic analyses of diversification in R. *Methods*  
526 *Ecol Evol.* 3:1084-1092.

527 FitzJohn, R. G., W. P. Maddison, and S. P. Otto. 2009. Estimating trait-dependent speciation and  
528 extinction rates from incompletely resolved phylogenies. *Syst Biol.* 58:595-611.

529 Forsman, A. 1995. Opposing fitness consequences of colour pattern in male and female snakes. *J Evol*  
530 *Biol.* 8:53-70.

531 Gadow, H. 1908. *Through southern Mexico.* Witherby and Co. Press, London, UK.

532 Gelman, A., Hwang J., and Vehtari A. 2014. Understanding predictive information criteria for Bayesian  
533 models. *Stat Comput.* 24:997-1016.

- 534 Grazziotin, F. G., H. Zaher, R. W. Murphy, G. Scrocchi, M. A. Benavides, Y. P. Zhang, and S. L.  
535 Bonatto. 2012. Molecular phylogeny of the New World Dipsadidae (Serpentes: Colubroidea): a  
536 reappraisal. *Cladistics* 28:437-459.
- 537 Greene, H. W., and R. W. McDiarmid. 1981. Coral snake mimicry: does it occur? *Science* 213:1207-  
538 1212.
- 539 Hecht, M. K., and D. Marien. 1956. The coral snake mimic problem: a reinterpretation. *J Morphol*  
540 98:335-365.
- 541 Hedges, S. B., A. Couloux, and N. Vidal. 2009. Molecular phylogeny, classification, and biogeography  
542 of West Indian racer snakes of the Tribe Alsophiini (Squamata, Dipsadidae, Xenodontinae).  
543 *Zootaxa* 2067:1-28.
- 544 Hinman, K. E., H. L. Throop, K. L. Adams, A. J. Dake, K. K. McLauchlan, and M. J. McKone. 1997.  
545 Predation by free-ranging birds on partial coral snake mimics: the importance of ring width and  
546 color. *Evolution* 51:1011-1014.
- 547 Jeffords, M. R., J. G. Sternburg, and G. P. Waldbauer. 1979. Batesian mimicry: field demonstration of  
548 the survival value of pipevine swallowtail and monarch color patterns. *Evolution* 33:275-286.
- 549 Katoh, K., K. Kuma, H. Toh, and T. Miyata. 2005. MAFFT version 5: improvement in accuracy of  
550 multiple sequence alignment. *Nucleic Acids Res.* 33:511-518.
- 551 King, R. B., and R. Lawson. 1995. Color pattern variation in Lake Erie water snakes: the role of gene  
552 flow. *Evolution* 47:1819-1833.
- 553 Lindell, L. E. and A. Forsman. 1996. Sexual dichromatism in snakes: support to flicker-fusion  
554 hypothesis. *Can J Zool.* 74:2254-2256.
- 555 Lloriu, S., X. Bonnet, F. Brischoux, and M. De Crignis. 2008. Is melanism adaptive in sea kraits?  
556 *Amphib-Reptilia.* 29:1-5.
- 557 Losos, J. B., and R. E. Ricklefs. 2009. Adaptation and diversification on islands. *Nature* 457:830-836.

558 Maddison, W. P., P. E. Midford, and S. P. Otto. 2007. Estimating a binary character's effect on  
559 speciation and extinction. *Syst Biol.* 56:701-710.

560 Maglio, V. J. 1970. West Indian xenodontine colubrid snakes: their probable origin, phylogeny, and  
561 zoogeography. *Bull Mus Comp Zool.* 141:1-54.

562 Mallet, J., and M. Joron. 1999. Evolution of diversity in warning color and mimicry: polymorphisms,  
563 shifting balance, and speciation. *Annu Rev Ecol Syst.* 30:201-233.

564 Mappes, J., N. Marples, and J. A. Endler. 2005. The complex business of survival by aposematism.  
565 *Trends Ecol Evol.* 20(11):598-603.

566 Marques O. A. V., and Puerto, G. 1991. Padrões cromáticos, distribuição e possível mimetismo em  
567 *Erythrolamprus aesculapii* (Serpentes, Colubridae). *Mem Inst Butantan.* 53(1):127-134.

568 Martins, M., and M. E. Oliveira. 1993. The snakes of the genus *Atractus* Wagler (Reptilia: Squamata:  
569 Colubridae) from the Manaus region, central Amazonia, Brazil *Zool Med.* 67:21-40.

570 Martins, M., and M. E. Oliveira. 1998. Natural history of snakes in forests of the Manaus region, cen-  
571 tral Amazonia, Brazil. *Herp Nat Hist.* 6:78-150.

572 Merilaita, S., and J. Lind. 2005. Background-matching and disruptive coloration, and the evolution of  
573 cryptic coloration. *Proc R Soc Lond B Biol Sci.* 272:665-670.

574 Minin, V., Z. Abdo, P. Joyce, and J. Sullivan. 2003. Performance-based selection of likelihood models  
575 for phylogeny estimation. *Syst Biol.* 52:674-683.

576 Pennell, M. W., R. G. FitzJohn, W. K. Cornwell, and L. J. Harmon. 2015. Model adequacy and the  
577 macroevolution of angiosperm functional traits. *Am Nat.* 186(2):E33-E50.

578 Pfennig, D. W., and S. P. Mullen. 2010. Mimics without models: causes and consequences of allopatry  
579 in Batesian mimicry complexes. *Proc R Soc Lond B Biol Sci.* 277:2577-2585.

580 Pfennig, D. W., W. R. Harcombe, and K. S. Pfennig. 2001. Frequency-dependent Batesian mimicry.  
581 *Nature* 410:323-323.



582 Pfennig, D. W., C. K. Akcali, and D. W. Kikuchi. 2015. Batesian mimicry promotes pre- and post-  
583 mating isolation in a snake mimicry complex. *Evolution* 69:1085-1090.

584 Pinheiro, C. E. G. 2011. On the evolution of warning coloration, Batesian and Müllerian mimicry in  
585 Neotropical butterflies: the role of jacamars (Galbulidae) and tyrant-flycatchers (Tyrannidae). *J*  
586 *Avian Biol.* 42:277-281.

587 Plummer M., N. Best, K. Cowles, and K. Vines. 2006. CODA: convergence diagnosis and output  
588 analysis for MCMC. *R News.* 6:7-11.

589 Pough, F. H. 1988. Mimicry and related phenomena. In: *Biology of Reptilia*, vol. 16, Ecology B,  
590 Defence and Life History, p. 154-234. Gans, C., Huey, R.B., Eds, New York, Allan R. Liss Inc.,  
591 New York.

592 Przeczek, K., C. Mueller, and S. M. Vamosi. 2008. The evolution of aposematism is accompanied by  
593 increased diversification. *Integr Zool.* 3:149-156.

594 Pyron, R. A., and F. T. Burbrink. 2009. Body size as a primary determinant of ecomorphological  
595 diversification and the evolution of mimicry in the lampropeltine snakes (Serpentes:  
596 Colubridae). *J Evol Biol.* 22:2057-2067.

597 Pyron, R. A., Burbrink, F. T., and J. J. Wiens. 2013. A phylogeny and updated classification of  
598 Squamata, including 4161 species of lizards and snakes. *BMC Evol Biol.* 13:93.

599 R Core Team. 2015. R: A language and environment for statistical computing. R Foundation for  
600 Statistical Computing, Vienna, Austria. URL <http://www.R-project.org/>.

601 Rabosky, D. L., and E. E. Goldberg. 2015. Model inadequacy and mistaken inferences of trait-  
602 dependent speciation. *Syst Biol.* 64:340-355.

603 Roze, J. A. 1996. *Coral Snakes of the Americas: Biology, Identification, and Venoms*. Krieger  
604 Publishing Company, Malabar, FL.

605 Santos, J. C., L. A. Coloma, and D. C. Canatella. 2003. Multiple, recurring origins of aposematism and  
606 diet specialization in poison frogs. *Proc Natl Acad Sci USA.* 100:12792-12797.

- 607 Savage, J. M. 2002. The amphibian and reptiles of Costa Rica: herpetofauna between two continents,  
608 between two seas. Chicago Univ. Press, Chicago, IL.
- 609 Savage, J. M., and J. B. Slowinski. 1992. The colouration of the venomous coral snakes (family  
610 Elapidae) and their mimics (families Aniliidae and Colubridae). Biol J Linn Soc. 45:235-254.
- 611 Sawaya, R. J., O. A. V. Marques, and M. Martins. 2008. Composição e história natural das serpentes de  
612 Cerrado de Itirapina, São Paulo, sudeste do Brasil. Biota Neotrop. 8(2):0-0. doi:10.1590/S1676-  
613 06032008000200015.
- 614 Sazima, I, and A. S. Abe.1991. Habits of five Brazilian snakes with coral-snake pattern, including a  
615 summary of defensive tactics. Stud Neotrop Fauna Environ. 26(3):159-164.
- 616 Smith, S. M. 1975. Innate recognition of coral snake pattern by a possible avian predator. Science  
617 187:759-760.
- 618 Smith, S. A., and C. Dunn. 2008. Phyutility: a phyloinformatics utility for trees, alignments, and  
619 molecular data. Bioinformatics 24:715-716.
- 620 Speed, M. P., and G. D. Ruxton. 2005. Aposematism: what should our starting point be? Proc R Soc  
621 Lond B Biol Sci. 272:431-438.
- 622 Speed, M. P., Brockhurst, M. A., and Ruxton G. D. 2010. The dual benefits of aposematism: Predator  
623 avoidance and enhanced resource collection. Evolution. 64(6):1622-1633.
- 624 Stadler, T. 2009. On incomplete sampling under birth-death models and connections to the sampling-  
625 based coalescent. J Theor Biol. 261:58-66.
- 626 Stevens, M., and S. Merilaita. 2009. Animal camouflage: current issues and new perspectives. Philos  
627 Trans R Soc Lond B Biol Sci. 364:423-427.
- 628 Stevens, M., and Ruxton, G. D. 2012. Linking the evolution and form of warning coloration in nature.  
629 Proc R Soc Lond B Biol Sci. 279:417-426.
- 630 Tanaka, K. 2005. Thermal aspects of melanistic and striped morphs of the snake *Elaphe*  
631 *quadrivirgata*. Zool Sci. 22:1173-1179.

632 Thayer, G.H. 1918. Concealing-coloration in the animal kingdom, ed. 2. New York.

633 Titcomb, G. C., D. W. Kikuchi, and D. W. Pfennig. 2014. More than mimicry? Evaluating scope for  
634 flicker-fusion as a defensive strategy in coral snake mimics. *Curr Zool.* 60:123-130.

635 Tozetti, A. M., R. B. Oliveira, and G. M. F. Pontes. 2009. Defensive repertoire of *Xenodon dorbignyi*  
636 (Serpentes, Dipsadidae). *Biota Neotrop.* 9:157-163.

637 Uetz, P., and J. Hosek (eds.). 2014. The Reptile Database, <http://www.reptile-database.org/>.

638 Wallace, A. R. 1867. Mimicry and other protective resemblances among animals. *Westminster Foreign*  
639 *Q. Rev.* 32:1-43.

640 Wilson, D., R. Heinsohn, and J. A. Endler. 2007. The adaptive significance of ontogenetic colour  
641 change in a tropical python. *Biol Lett.* 3:40-43.

642 Yule, G. U. 1924. A mathematical theory of evolution, based on the conclusions of Dr J. C. Willis.  
643 *Philos Trans R Soc Lond B Biol Sci.* 213:21-87.

644 Zaher, H., F. G. Grazziotin, J. E. Cadle, R. W. Murphy, J. C. Moura-Leite, and S. L. Bonatto. 2009.  
645 Molecular phylogeny of advanced snakes (Serpentes, Caenophidia) with an emphasis on South  
646 American Xenodontines: A revised classification and descriptions of new taxa. *Pap Avul de Zool*  
647 49:115-153.

648 Zweifel, R. G. 1960. Herpetology of the Tres Maria Islands. Results of the Puritan-American Museum  
649 of Natural History expedition to Western Mexico. *Bull Am Mus Nat Hist.* 119:77-128.

650 Zwickl, D. J. 2011. GARLI 2.0 [https://www.nescent.org/wg\\_garli/main\\_page](https://www.nescent.org/wg_garli/main_page).

651

## 652 FIGURE LEGENDS

653

654 **Figure 1.** Maximum clade credibility (MCC) tree of the family Dipsadidae showing the number of  
 655 species assigned to each color category (center) and the Maximum Likelihood (ML) ancestral state  
 656 estimate for the color categories: *coral-mimic* versus *non-mimic* (left) and *contrasting* versus *cryptic*  
 657 (right). Each color of the stacked bar chart (center) correspond to characteristics of the color patterns;  
 658 species that do not show contrasting color patterns (i.e., cryptic coloration) are shown in gray, species  
 659 with contrasting color patterns but that are not supposed mimics of coral snakes are shown in yellow,  
 660 and species that show contrasting color patterns and are considered mimics of coral snakes are shown  
 661 in red. The legend in the center of the plate applies different combinations of gray, yellow, and red to  
 662 show the number of species assigned to the color patterns: *coral-mimic* (red) versus *non-mimic* (gray  
 663 and yellow) and *contrasting* (yellow and red) versus *cryptic* (gray). The phylogeny on the left shows  
 664 the ML ancestral estimate for *coral-mimic* in red and *non-mimic* in gray. The phylogeny on the right  
 665 shows the ML ancestral estimate for *contrasting* in yellow and *cryptic* in gray. Both reconstructions  
 666 were made under the trait-independent BiSSE model. The colored genera correspond to those  
 667 associated with a tendency for higher speciation rates as a result of the MEDUSA analyses (compare  
 668 with Figure S3). The tribe Alsophiini is highlighted in green, the two genera belonging to the tribe  
 669 Hydropsini are marked in blue, and the taxa in red belong to the Tachymenini. Support for the nodes of  
 670 the MCC tree are provided in Figure S1.

671

672 **Figure 2.** Posterior distributions of net diversification rates under the trait-dependent and trait-  
 673 independent BiSSE models. Estimates are the joint posterior distribution from 100 MCMC BiSSE runs  
 674 with randomly sampled trees. Prior distributions for the MCMC searches are shown in blue (unmarked  
 675 distributions), the horizontal lines below each posterior distribution represent the 95% confidence  
 676 interval, and the vertical hashed lines show median values. Top: Trait-dependent diversification rates of

the *non-mimic* color pattern as gray and the *coral-mimic* color pattern as red. Bottom: Trait-dependent model with *cryptic* color pattern in gray and *contrasting* pattern in red. Both charts show the single diversification rate of the trait-independent model in yellow. Each posterior distribution is also identified by the letters (a), (b), and (c).

**Figure 3.** Posterior distributions of transition rates under the trait-dependent and trait-independent BiSSE models. Estimates are the joint posterior distribution from 100 MCMC BiSSE runs with randomly sampled trees. Prior distributions for the MCMC searches are shown in blue (unmarked distributions), the horizontal lines below each posterior distribution represent the 95% confidence interval, and the vertical hashed lines show median values. Top: Transition rates from the *non-mimic* to the *coral-mimic* (q01 - red) color pattern and back (q10 - gray). Bottom: Transition rates from the *cryptic* to the *contrasting* (q01 - red) color pattern and back (q10 - gray). Each chart shows results from the trait-dependent and trait-independent BiSSE models identified with different shades of the correspondent transition color and the reference letters (a), (b), (c), and (d).

**Figure 4.** Results from the posterior predictive simulations for BiSSE under the trait-dependent (top row - red) and the trait-independent model (bottom row - blue). Simulation parameters drawn from the joint posterior distribution of each BiSSE model estimated from the observed data (categories *contrasting* and *cryptic*) and phylogenetic trees. At each replicate a phylogeny was simulated under the BiSSE model until the sum of branch lengths from root to tip of the tree was equal to 1. Left column: Total number of species in the resulting phylogenies. Vertical dashed lines show the richness of the Dipsadidae family used in our analysis (594 spp.). Right column: Relative frequency of the state 0 (*cryptic*). Vertical dashed lines show the observed frequency of *cryptic* species in the data (0.64). Note that both BiSSE models show similar deviations from the observed data.

702 **Figure 1.**

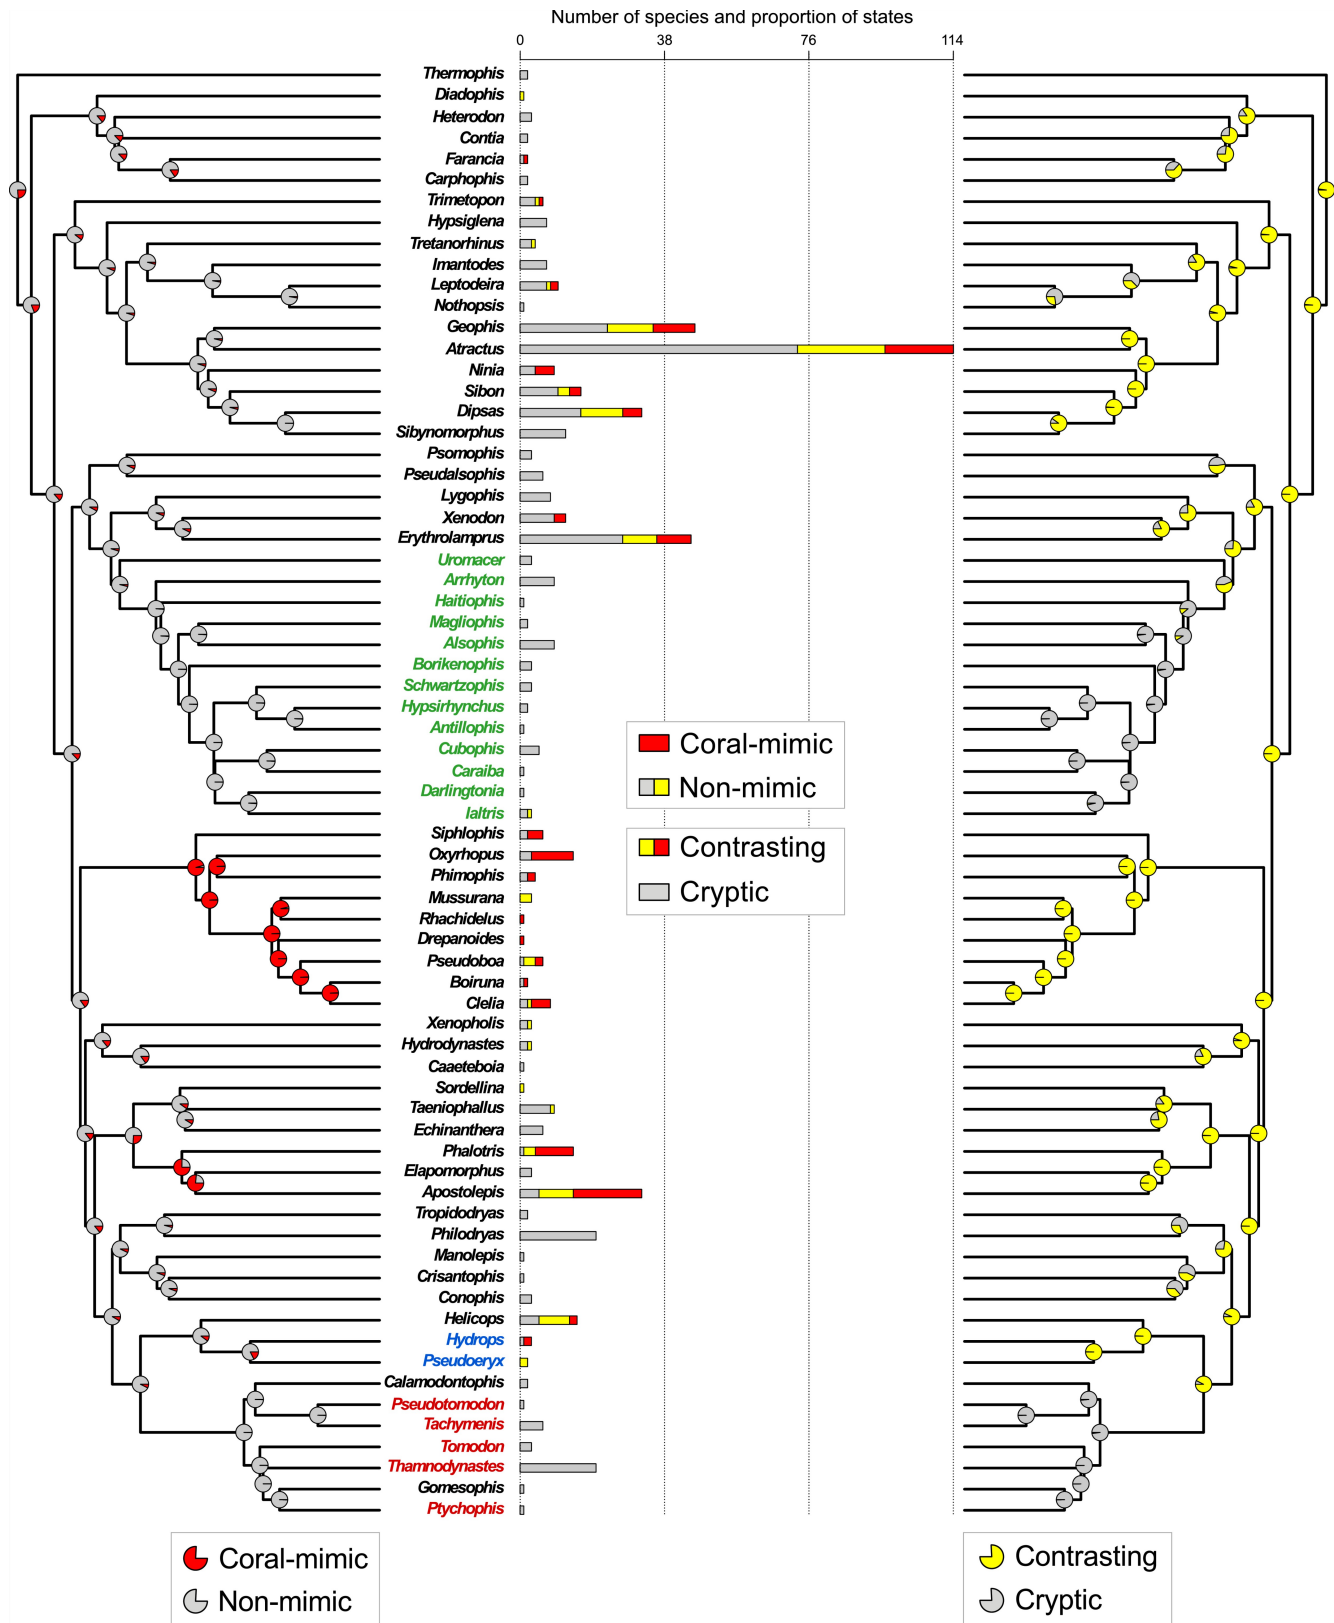

704 **Figure 2.**

705

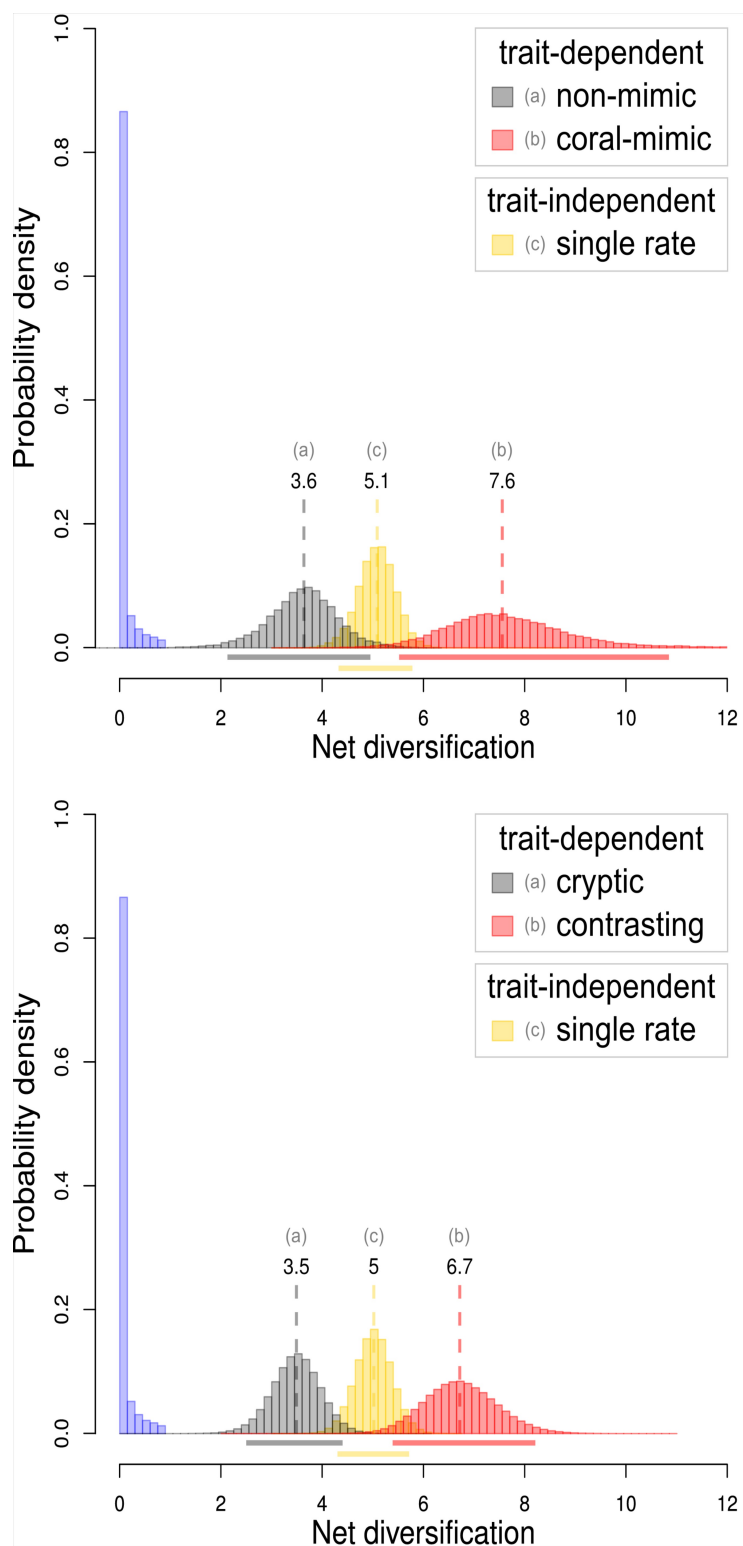

706 **Figure 3.**

707

708

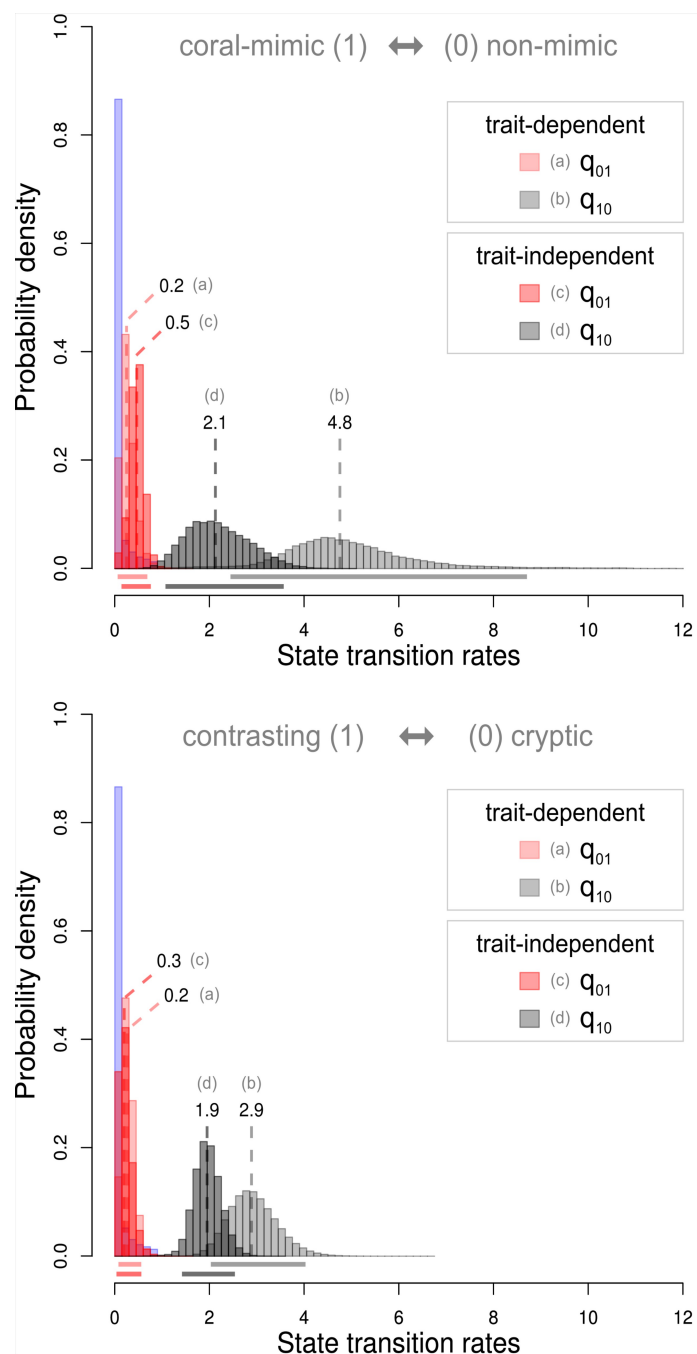



709 **Figure 4.**

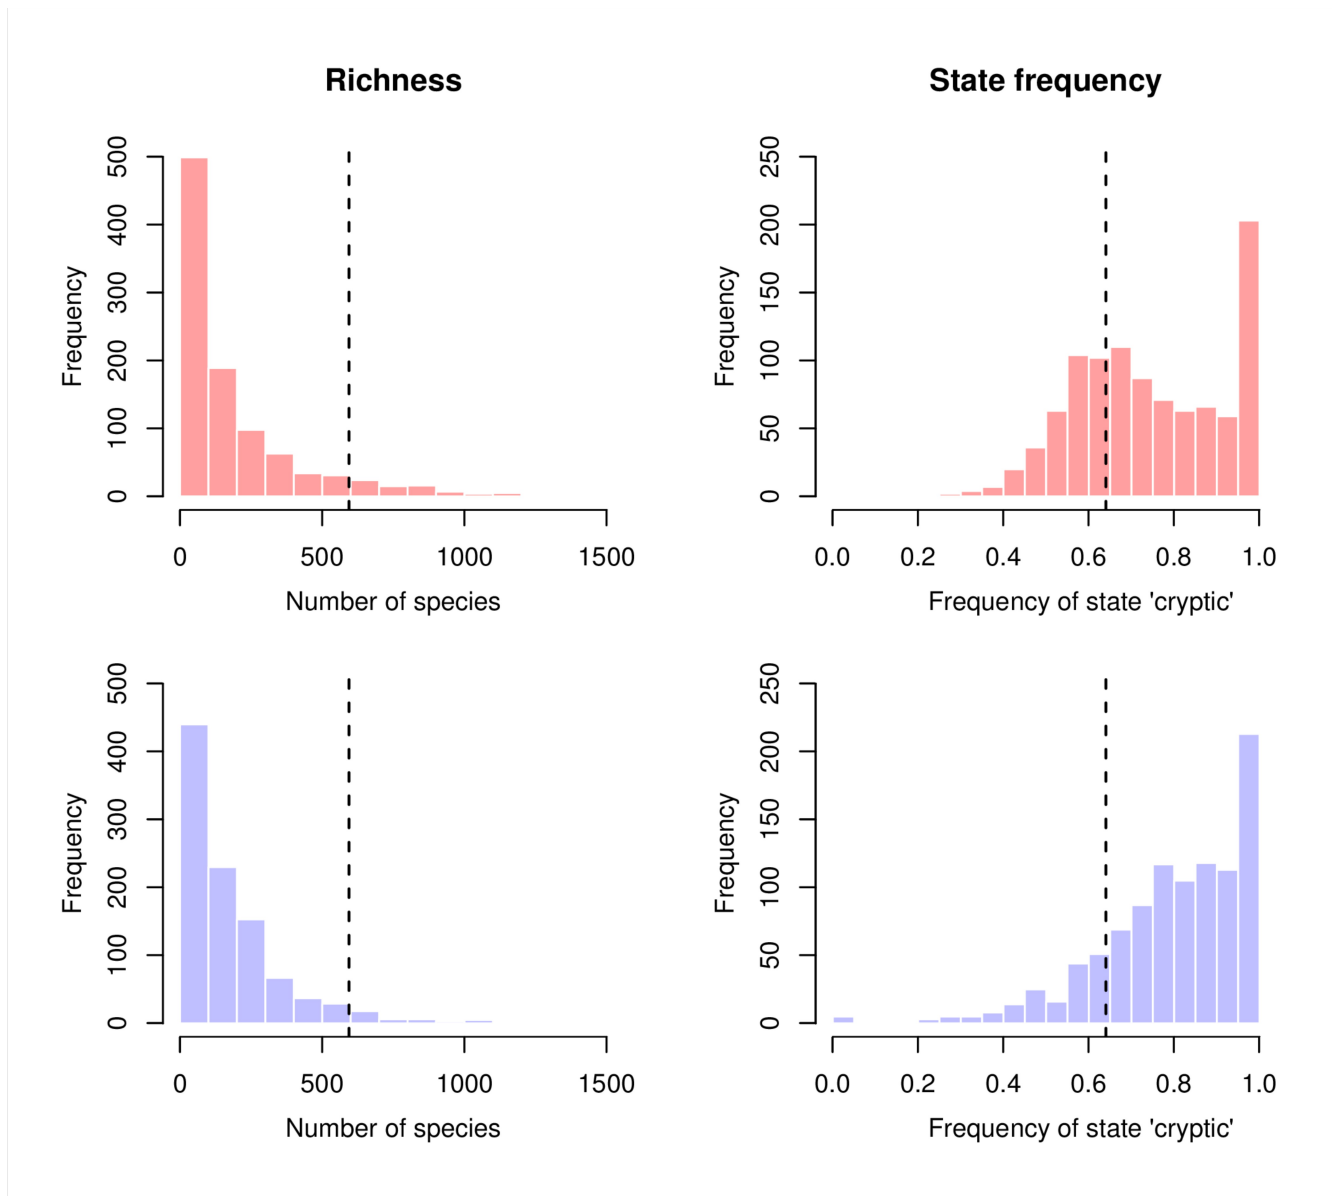

**Figure S1:** Maximum clade credibility tree with all species used in the analysis. Values in the branches are the respective posterior probabilities for each node. Species are named with the two first letters of the genus followed by the complete species name. Refer to the Table 1 in FigShare (<http://dx.doi.org/10.6084/m9.figshare.831493>) for the complete name of each species. See Material and Methods of the main text for more information on the methods of tree inference.

**Figure S2:** Results of model selection using the Bayesian Deviance Information Criteria (DIC) for the *coral-mimic* versus *non-mimic* (left) and *contrasting* versus *cryptic* (right). DIC values calculated across 100 randomly sampled trees. Values are DIC scores for the trait-dependent model (full model) subtracted from the scores for the trait-independent model (constrained model). Large values—larger than 4 units as a rule of thumb—are expected if the trait-dependent model is to be preferred over the simpler trait-independent model.

**Figure S3:** Results of the MEDUSA analyses across 100 trees sampled from the posterior distribution of trees generated by the BEAST analysis. The box plots show the distribution of rates of speciation estimated under a Yule model. The colors green, blue, and red denote genera that show a tendency for higher rates of speciation when compared to the background rates shown in gray. The order of genera and color coding is the same used in the Figure 1. Genera shown in green belong to the tribe Alsophiini, in blue to the tribe Hydropsini, and in red to the tribe Tachymenini.

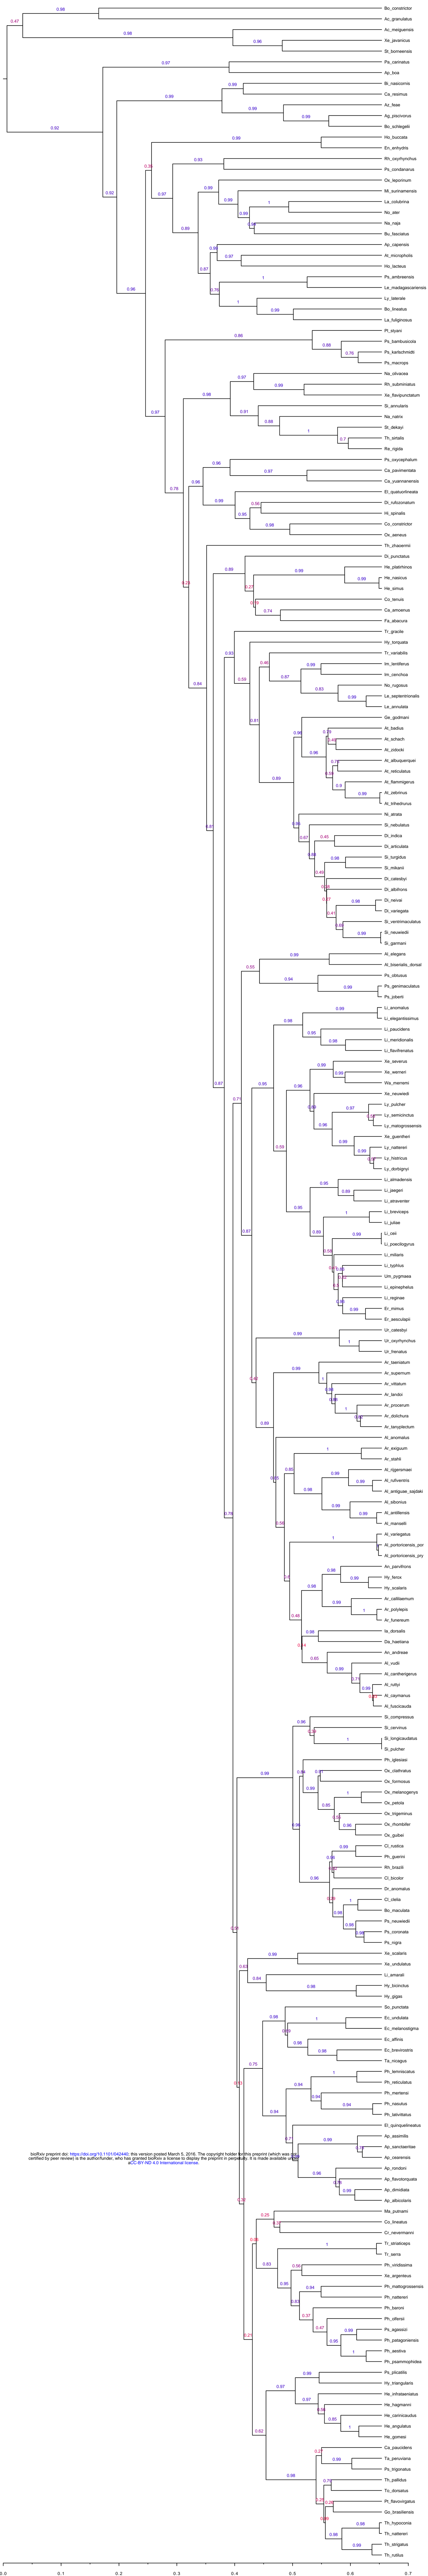

**coral-mimic vs. non-mimic**

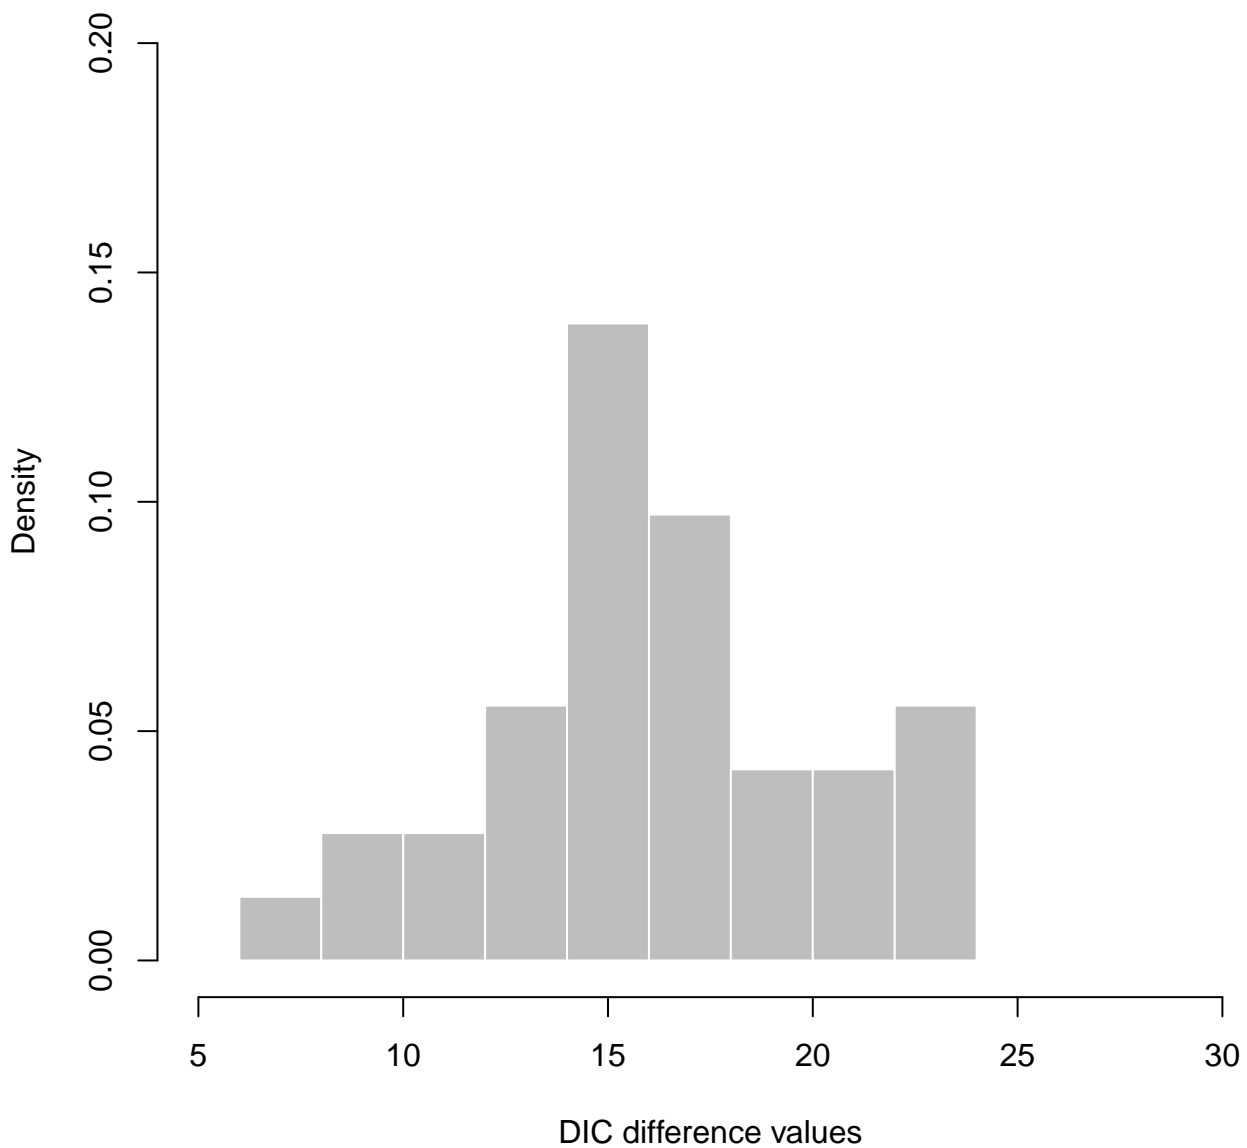

**contrasting vs. cryptic**

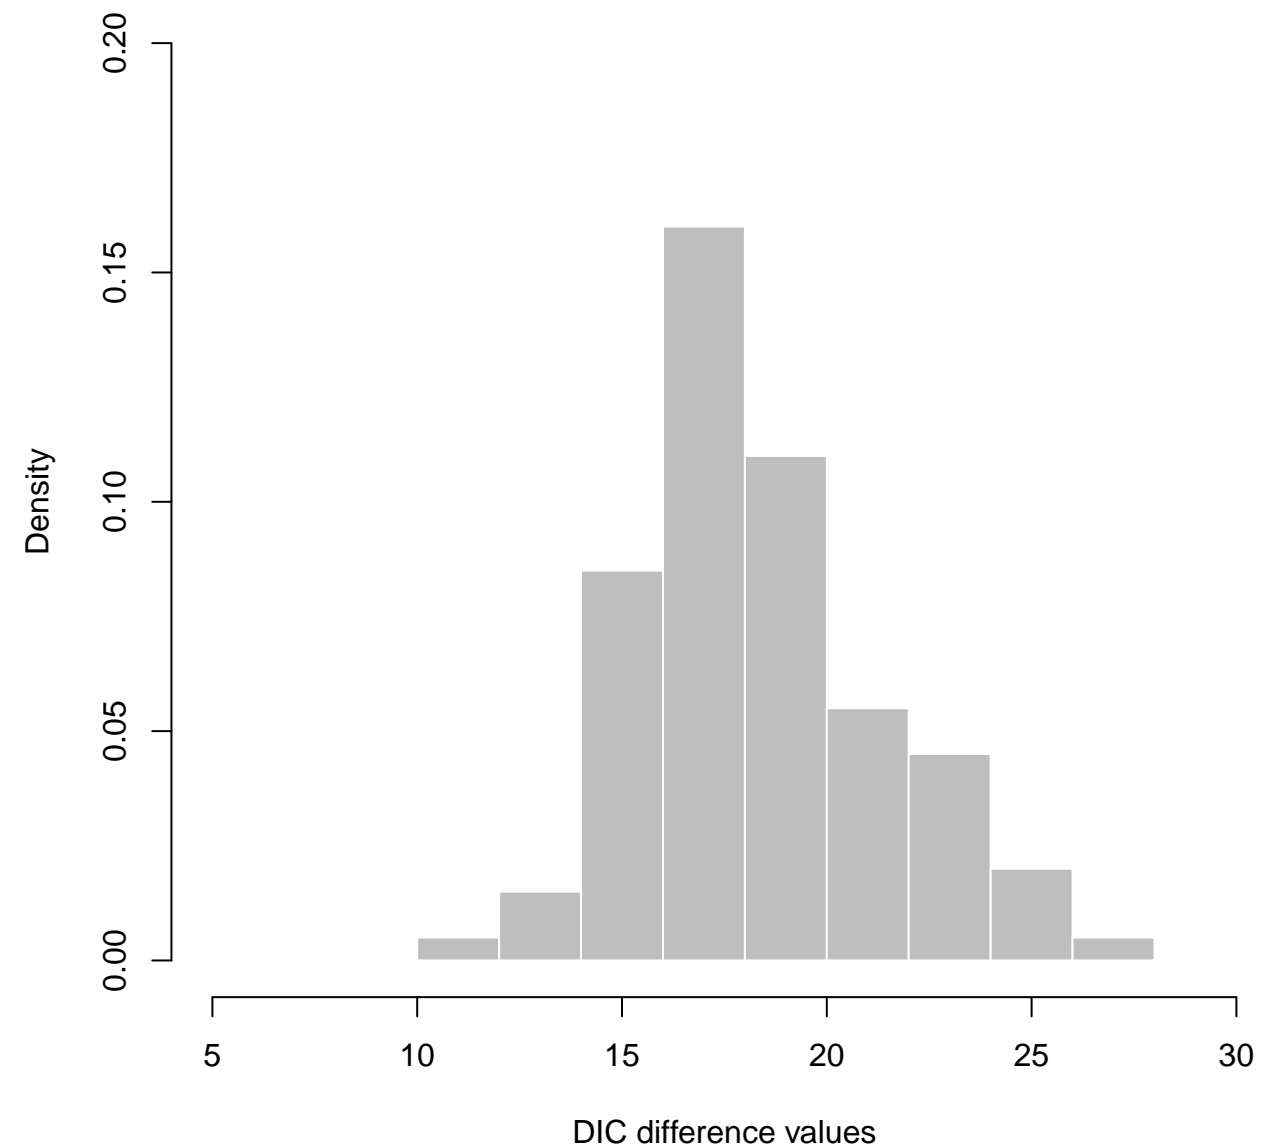

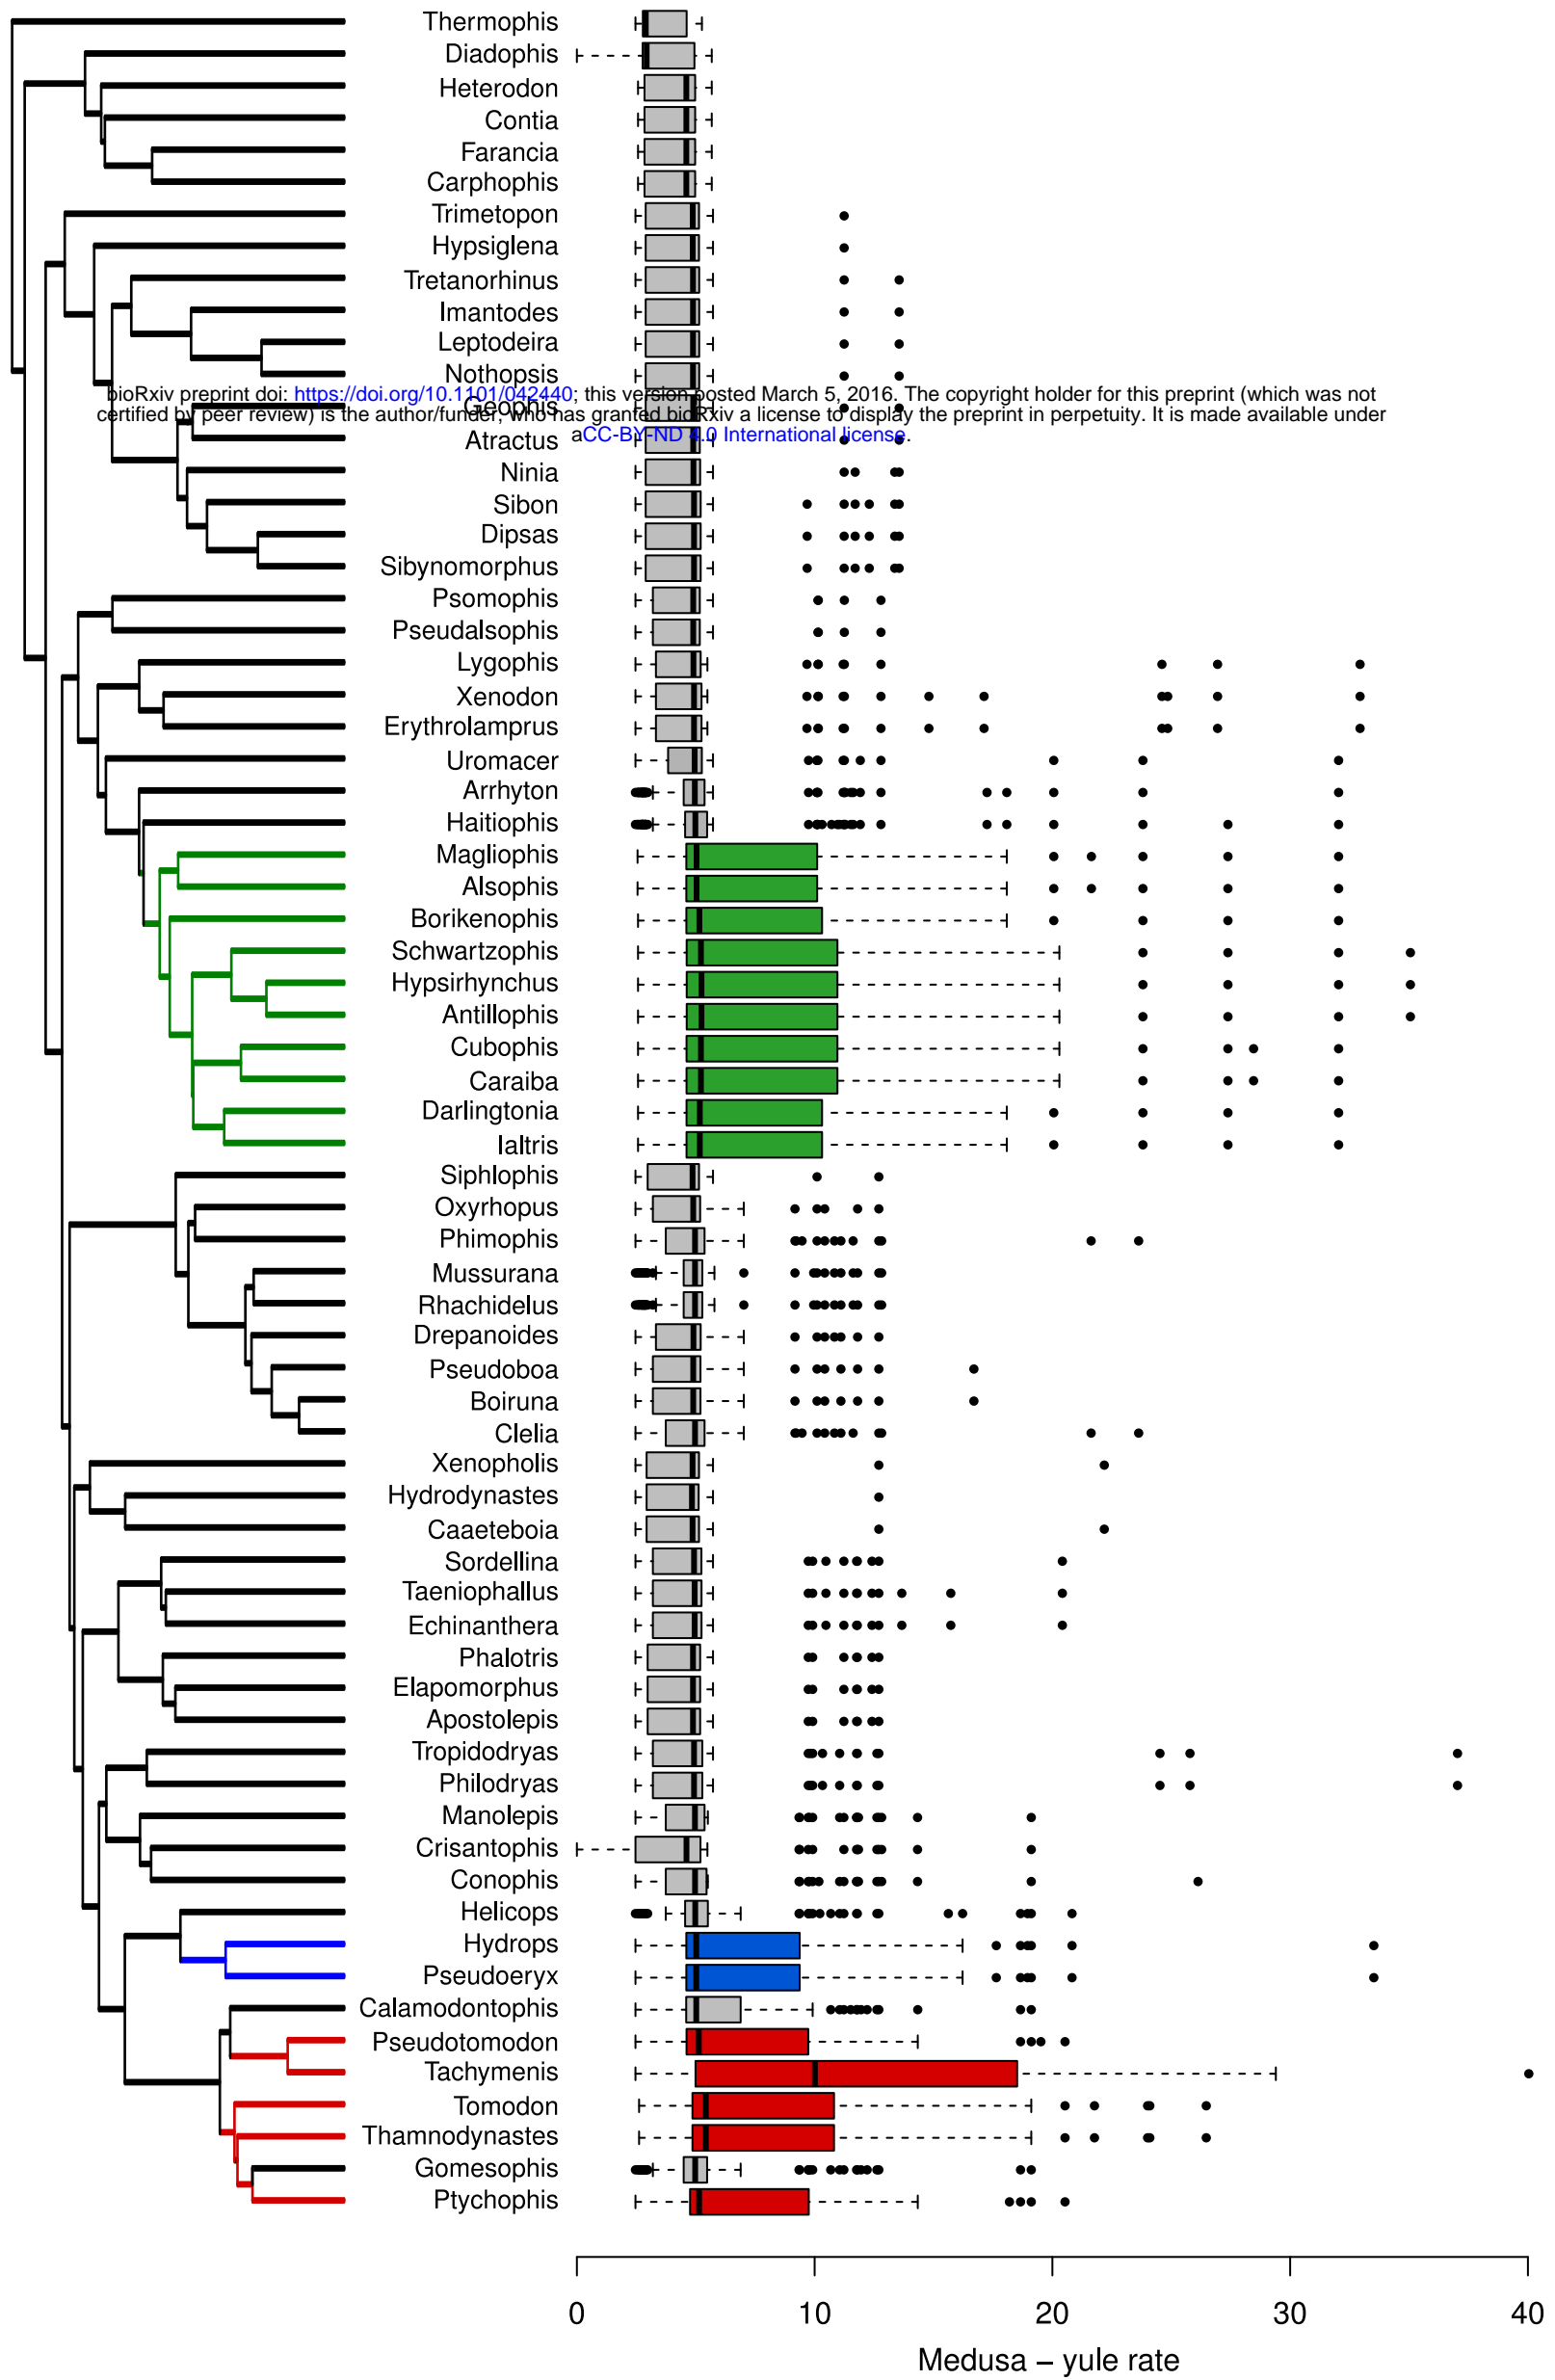

Source: https://www.biorxiv.org/content/10.1101/042440v1.full.pdf
